# Supplementary material for: The expanding network of mineral chemistry throughout earth history reveals global shifts in crustal chemistry during the Proterozoic
Source: PubMed Central journal article supplement (PMC8943050; doi:10.1038/s41598-022-08650-x), 2022-03-23

# wMEE<sub>CV</sub> Preserved in the Geologic Record

- Oxygen Minerals
- All Other Minerals

Reduced soft acid/base  
mineral occurrences

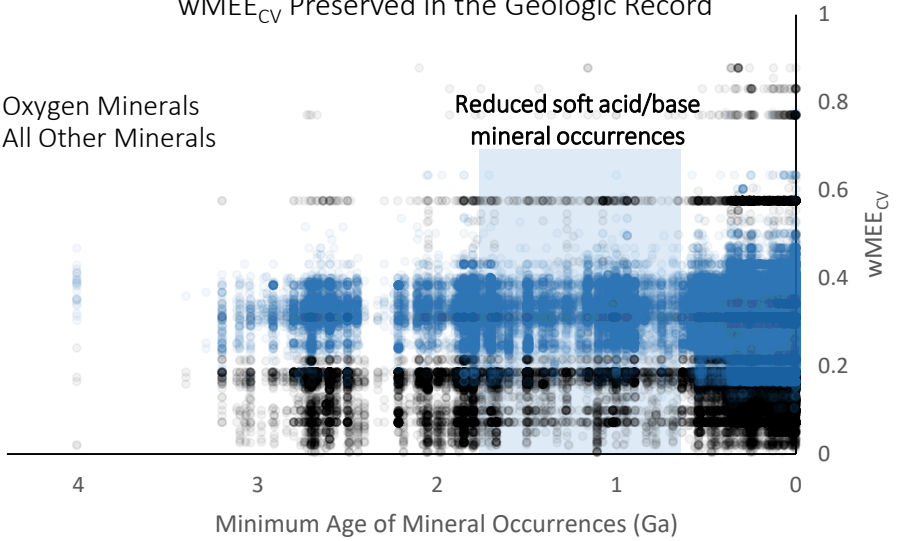

Supplement: 41598_2022_8650_MOESM2_ESM.pdf [file 41598_2022_8650_MOESM2_ESM.pdf]
